# Supplementary material
Source: PubMed Central journal article supplement (PMC4480061)
Supplement: NIHMS686209-supplement-Supplementary_Material_Online.pdf [file NIHMS686209-supplement-Supplementary_Material_Online.pdf]

## Supplemental Material

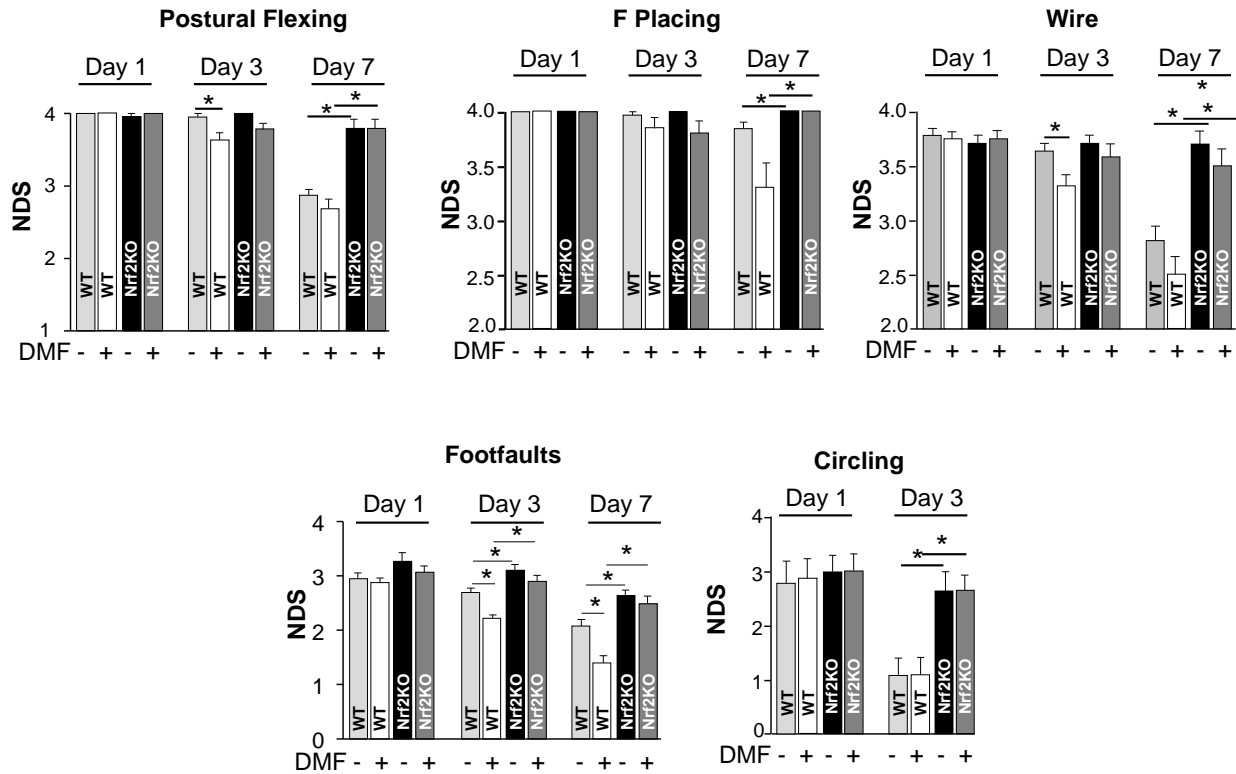

**Figure I.** The performance on postural flexing, forward placing, wire hanging, footfault, and circling tests on d1, d3, and d7 after ICH. In this graph all the experimental groups (Fig 5 and Fig I Supplement) were pooled together with the number of animals per group being n=11-12 for day 1 and 3, and n=8-5 for day 7. The DMF at 15mg/kg was injected, i.p, at 24h, and then on d2 and d3 after ICH. \*p≤0.05.

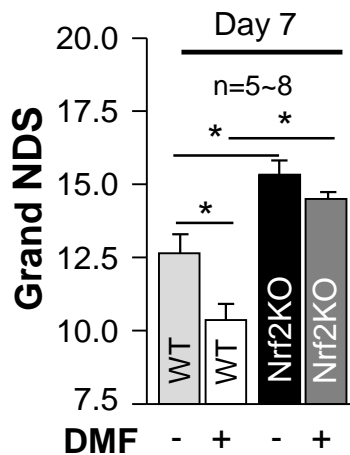

**Figure II.** Grand NDS in WT and in Nrf2-KO mice on d7 after ICH. The DMF at 15mg/kg was injected i.p, at 24h after ICH and then on d2, and d3 after ICH. \*p≤0.05 vs. indicated groups. Number of animals per group is indicated above the graph.

**Table I RT-PCR Primer List**

| <b>Gene Name</b> |   | <b>Primer Sequence</b> | <b>Product Size (bp)</b> | <b>Gene Code</b> | <b>Primer location</b> |
|------------------|---|------------------------|--------------------------|------------------|------------------------|
| Nrf-2            | F | tgagaaacattgtcgagctg   | 482                      | U20532           | 1781-                  |
|                  | B | ctcccaaattggtgcctaaga  |                          |                  | -2262                  |
| catalase         | F | cctcgttcaggatgtggttt   | 325                      | X52108           | 150-                   |
|                  | B | ggcatccctgatgaagaaaa   |                          |                  | -474                   |
| NQO1             | F | tagcctgtagccagccctaa   | 401                      | NM008706         | 95-                    |
|                  | R | gtctgcagcttccagcttct   |                          |                  | -495                   |
| HO-1             | F | tgggtcctcactctcagctt   | 382                      | X13356           | 885-                   |
|                  | B | gtcgtggtcagtcaacatgg   |                          |                  | -1266                  |
| Haptoglobin      | F | ctctacgtggggaaaaacca   | 353                      | NM017370         | 538-                   |
|                  | B | cagaagggtgtgctcgttcaa  |                          |                  | -890                   |
| CD36             | F | gagcaactggtggatggttt   | 438                      | NM007643         | 46-                    |
|                  | B | tgggtttgcacatcaaaga    |                          |                  | -483                   |
| CD163            | F | ctggaagagtggaggctctgc  | 496                      | AF274883         | 2270-                  |
|                  | B | tgcacacgatctaccacat    |                          |                  | -2765                  |
| IL-10            | F | ccaagccttatcggaatga    | 661                      | NM010548         | 315-                   |
|                  | R | aagtgtggccagccttagaa   |                          |                  | -975                   |
| iNOS             | F | cagaggaccagagacaagc    | 488                      | NM010927         | 543-                   |
|                  | B | actgggtgaactccaagggtg  |                          |                  | -1030                  |
| IL-1b            | F | gggcctcaaaggaaagaatc   | 612                      | NM008361         | 599-                   |
|                  | R | ctcagtcaggctatgacca    |                          |                  | -1210                  |
| GAPDH            | F | tgttctaccccaatgtgt     | 396                      | NM001001303      | 754-                   |
|                  | R | tgtgaggagatgctcagtg    |                          |                  | -1149                  |
